32. D'Angelica M, Kornprat P, Gonen M, Chung KY, Jarnagin WR, DeMatteo RP, Fong Y, Kemeny N, Blumgart LH, Saltz LB: Lack of evidence for increased operative morbidity after hepatectomy with perioperative use of bevacizumab: A matched case-control study. *Ann Surg Oncol* 2007; 14:759-65
33. Reddy SK, Morse MA, Hurwitz HI, Bendell JC, Gan TJ, Hill SE, Clary BM: Addition of bevacizumab to irinotecan- and oxaliplatin-based preoperative chemotherapy regimens does not increase morbidity after resection of colorectal liver metastases. *J Am Coll Surg* 2008; 206:96-106
34. Scappaticci FA, Fehrenbacher L, Cartwright T, Hainsworth JD, Heim W, Berlin J, Kabbinavar F, Novotny W, Sarkar S, Hurwitz H: Surgical wound healing complications in metastatic colorectal cancer patients treated with bevacizumab. *J Surg Oncol* 2005; 91:173-80
35. Burkitt K, Chun SY, Dang DT, Dang LH: Targeting both HIF-1 and HIF-2 in human colon cancer cells improves tumor response to sunitinib treatment. *Mol Cancer Ther* 2009; 8:1148-56
36. Raphael J, Zuo Z, Abedat S, Beeri R, Gozal Y: Isoflurane preconditioning decreases myocardial infarction in rabbits *via* up-regulation of hypoxia inducible factor 1 that is mediated by mammalian target of rapamycin. *ANESTHESIOLOGY* 2008; 108:415-25
37. Li QF, Wang XR, Yang YW, Su DS: Up-regulation of hypoxia inducible factor 1alpha by isoflurane in Hep3B cells. *ANESTHESIOLOGY* 2006; 105:1211-9
38. Ma D, Lim T, Xu J, Tang H, Wan Y, Zhao H, Hossain M, Maxwell PH, Maze M: Xenon preconditioning protects against renal ischemic-reperfusion injury *via* HIF-1alpha activation. *J Am Soc Nephrol* 2009; 20:713-20
39. Wakamatsu T, Tanaka T, Oda S, Nishi K, Harada H, Daijo H, Takabuchi S, Kai S, Fukuda K, Hirota K: The intravenous anesthetics barbiturates inhibit hypoxia-inducible factor 1 activation. *Eur J Pharmacol* 2009; 617:17-22
40. Takabuchi S, Hirota K, Oda S, Nishi K, Oda T, Shingu K, Adachi T, Fukuda K: Opioid receptor stimulation does not affect cellular hypoxia-induced gene responses mediated by hypoxia-inducible factor 1 in cultured cell lines. *J Anesth* 2005; 19:263-5
41. Roy S, Balasubramanian S, Wang J, Chandrashekar Y, Charboneau R, Barke R: Morphine inhibits VEGF expression in myocardial ischemia. *Surgery* 2003; 134:336-44
42. Izzedine H, Ederhy S, Goldwasser F, Soria JC, Milano G, Cohen A, Khayat D, Spano JP: Management of hypertension in angiogenesis inhibitor-treated patients. *Ann Oncol* 2009; 20:807-15
43. Kim HK, Zhang YP, Gwak YS, Abdi S: Phenyl N-tert-butyl nitron, a free radical scavenger, reduces mechanical allodynia in chemotherapy-induced neuropathic pain in rats. *ANESTHESIOLOGY* 2010; 112:432-9

## ANESTHESIOLOGY REFLECTIONS

### The 45-cent Harvey Cushing Stamp

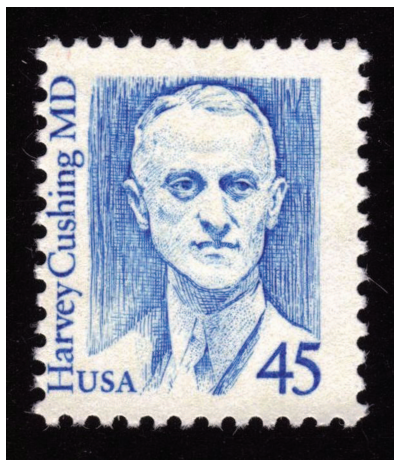

Anesthesiologists hail Harvey Cushing, M.D. (1869–1939), for popularizing intraoperative anesthetic records, sphygmomanometry, and precordial auscultation. Himself a world-class illustrator as well as neurosurgeon, Cushing was portrayed with charcoal by John Singer Sargent in 1916, a full 72 yr before the 1988 first-day issue of that portrait on a 45-cent stamp by the U.S. Postal Service. That release frustrated efforts to honor dentist-anesthetist Horace Wells but certainly pleased U.S. President Ronald Reagan, who had unveiled the stamp on Cushing's birthday in 1987 at the White House Rose Garden before the adopted daughter of Cushing's neurosurgical disciple Loyal Davis—First Lady Nancy Davis Reagan. (Copyright © the American Society of Anesthesiologists, Inc. This image appears in color in the *Anesthesiology Reflections* online collection available at [www.anesthesiology.org](http://www.anesthesiology.org).)

George S. Bause, M.D., M.P.H., Honorary Curator, ASA's Wood Library-Museum of Anesthesiology, Park Ridge, Illinois, and Clinical Associate Professor, Case Western Reserve University, Cleveland, Ohio. [UJYC@aol.com](mailto:UJYC@aol.com).
